# Supplementary material for: Genetic mapping of centromeres in the nine Citrus clementina chromosomes using half-tetrad analysis and recombination patterns in unreduced and haploid gametes
Source: PubMed Central journal article supplement (PMC4367916; doi:10.1186/s12870-015-0464-y), 2015-03-08

Additional file 4. Observed heterozygosity restitution (HR frequency) values for markers (squares) and theoretical functions for SDR with partial interference (x-axis indicates Kosambi's distance) and no interference models (x-axis indicates Haldane's distance).

## LG 1

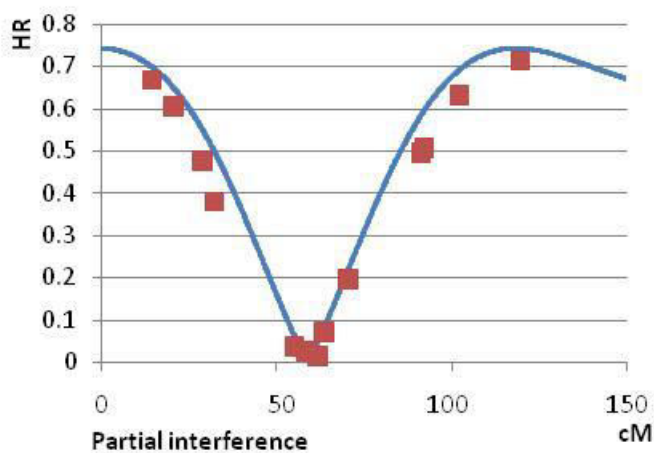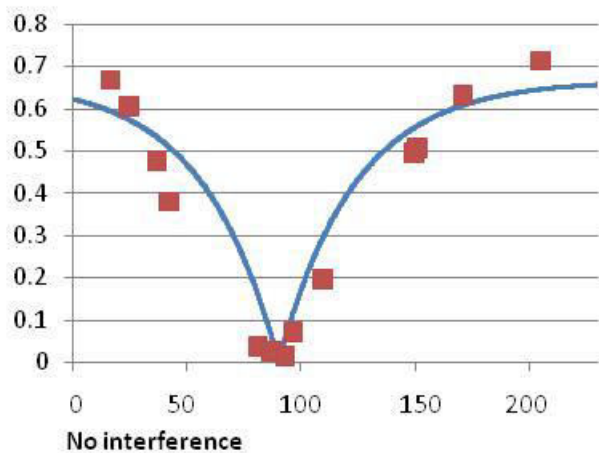

## LG 2

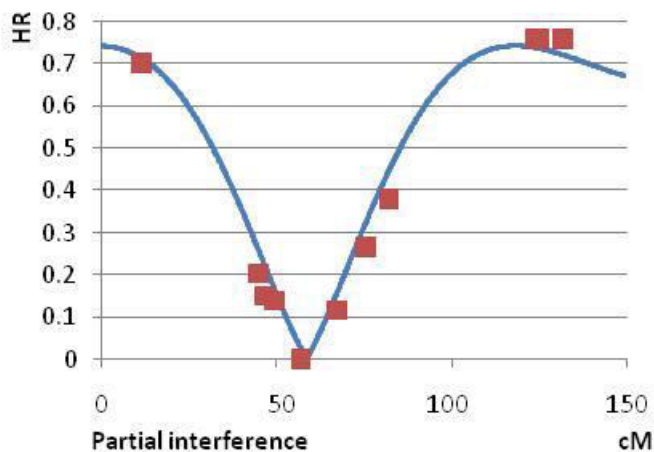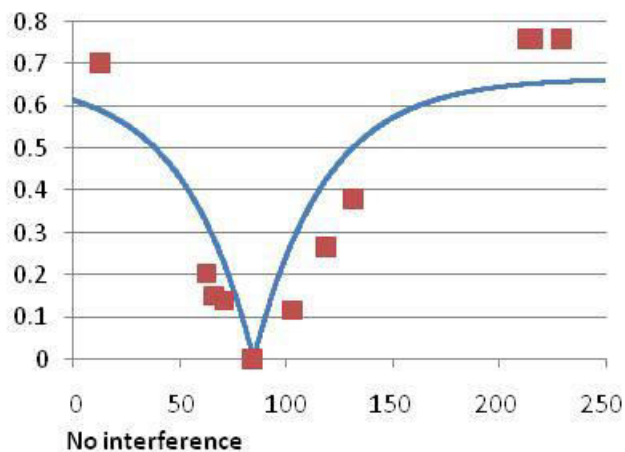

## LG 3

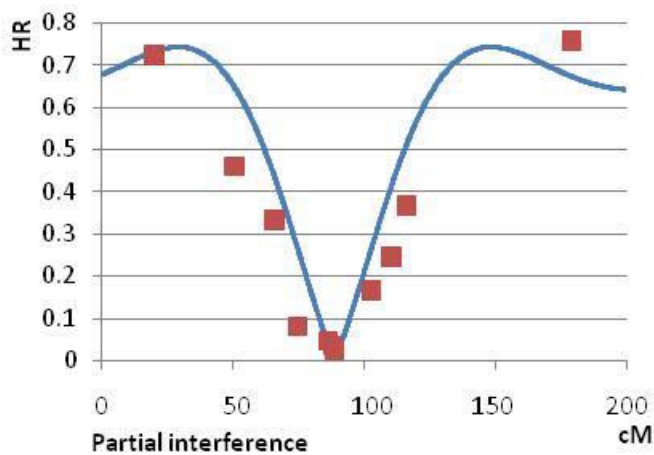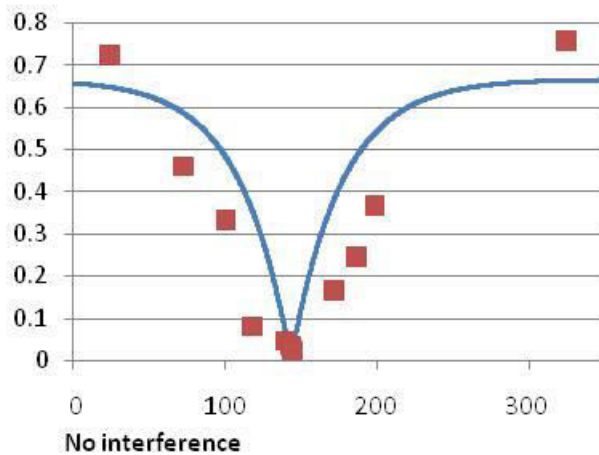

## LG 4

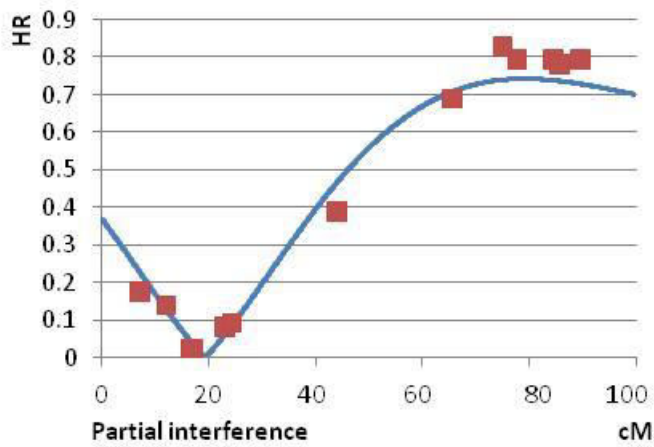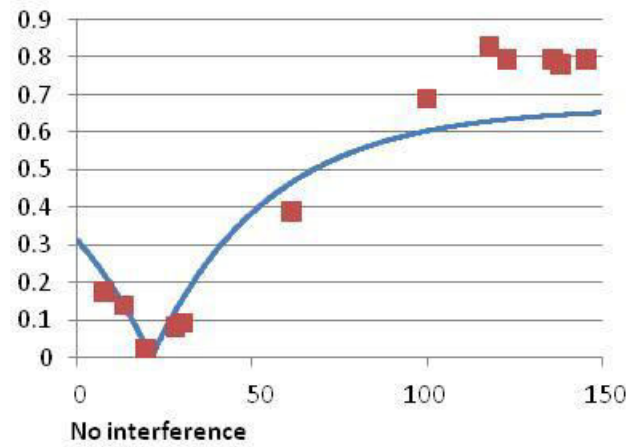

## LG 5

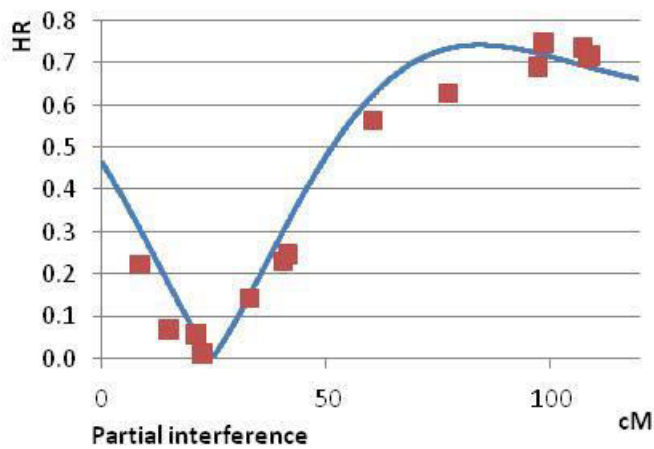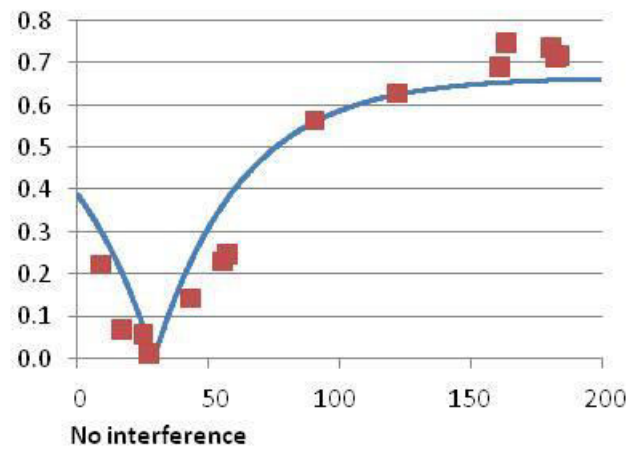

## LG 6

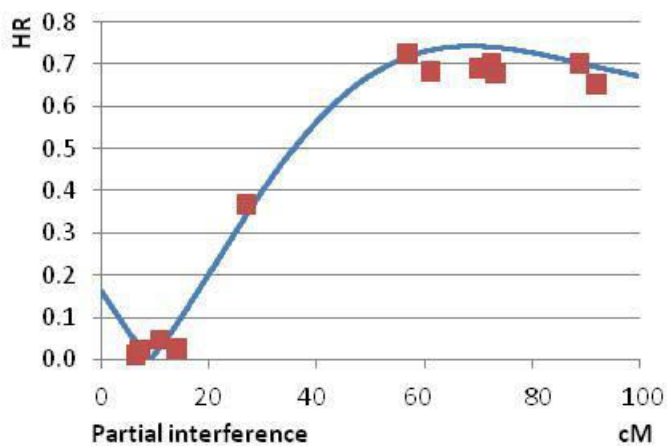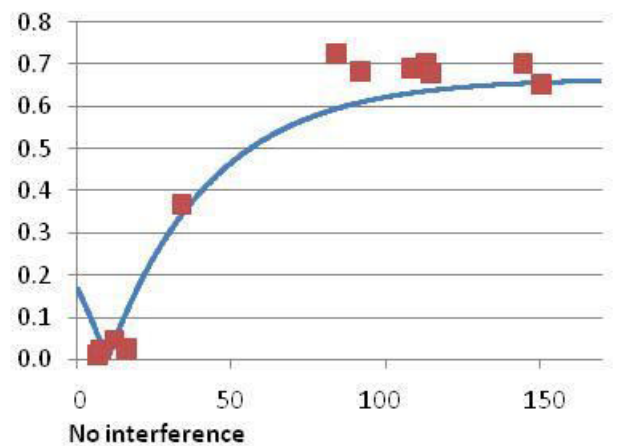

## LG 7

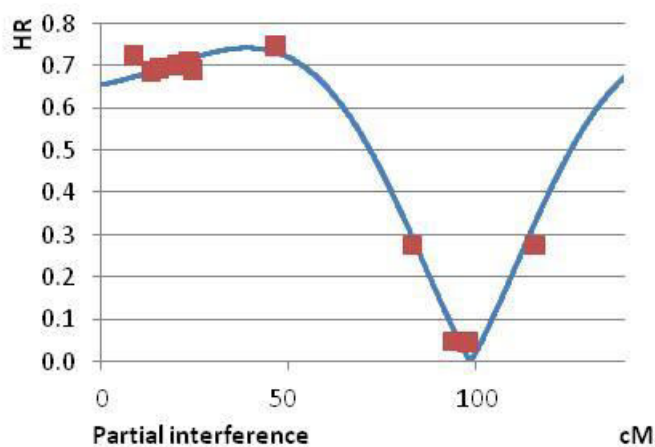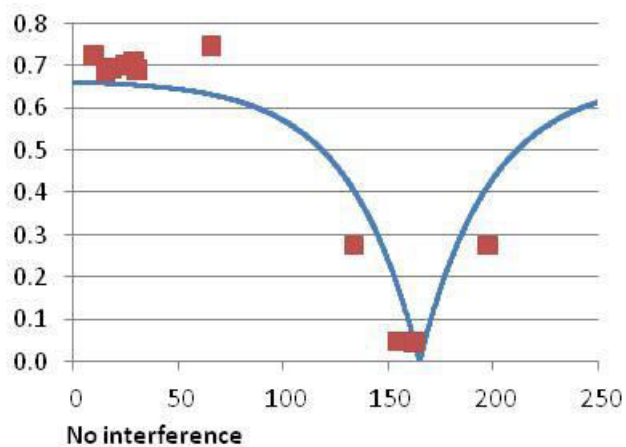

## LG 8

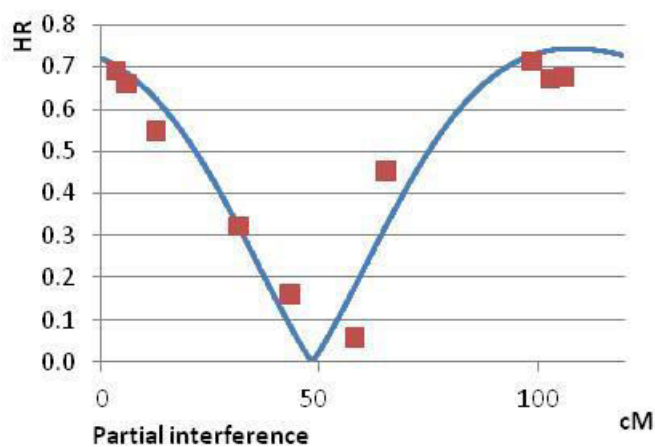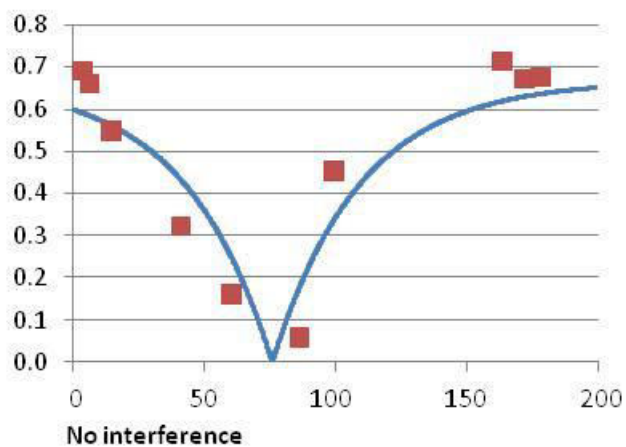

## LG 9

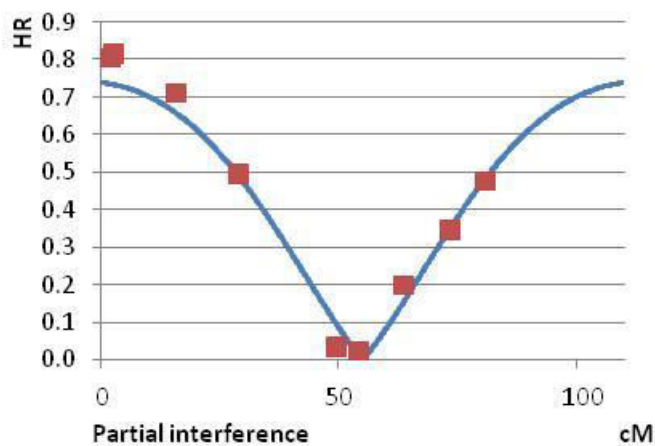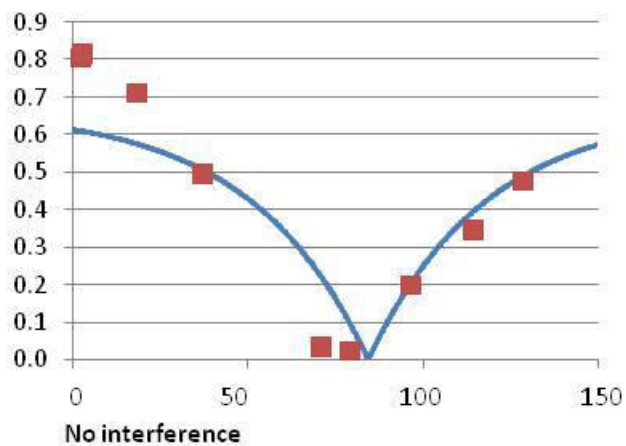

Supplement: 12870_2015_464_MOESM4_ESM.pdf [file 12870_2015_464_MOESM4_ESM.pdf]
