# Supplementary material for: Genetic mapping of centromeres in the nine Citrus clementina chromosomes using half-tetrad analysis and recombination patterns in unreduced and haploid gametes
Source: PubMed Central journal article supplement (PMC4367916; doi:10.1186/s12870-015-0464-y), 2015-03-08
Supplement: 12870_2015_464_MOESM1_ESM.pdf [file 12870_2015_464_MOESM1_ESM.pdf]

**Additional file 1. Characteristics and genetic/physical positions of the SSR, InDel and SNP markers used in mapping of triploid progenies to determine the positions of the centromeres**

| Marker       | Gene Bank<br>Accession | Linkage<br>Group | Genetic<br>position<br>(cM);[31] | Physic<br>position (nt);<br>[32] | Alleles <sup>1</sup> |           | Bibliographic reference   |
|--------------|------------------------|------------------|----------------------------------|----------------------------------|----------------------|-----------|---------------------------|
|              |                        |                  |                                  |                                  | Fina                 | Nadorcott |                           |
| CIBE6147     | ET085226               | 1                | 14,4                             | 1755414                          | 205 - 213            | 207 - 213 | [93]                      |
| CiC4827-01   | ET072918               | 1                | 20,54                            | 2036846                          | GA                   | AA        | [37]                      |
| CiC2110-01   | ET099643               | 1                | 28,82                            | 3241022                          | CA                   | AA        | [37]                      |
| MEST057      | DY267931               | 1                | 32,16                            | 3730905                          | 218 - 221            | 218 - 218 | In preparation            |
| CID0806      | ET094469               | 1                | 55,17                            | 7860474                          | 368 - 380            | 371 - 380 | [94]                      |
| CiBE5720     | ET082224               | 1                | 58,45                            | 13332543                         | 325 - 336            | 329 - 336 | [93]                      |
| MEST539      | DY294904               | 1                | 61,82                            | 16725002                         | 104 - 108            | 104 - 104 | In preparation            |
| CiC4581-01   | ET109034               | 1                | 63,66                            | 17994845                         | AC                   | AA        | [37]                      |
| MEST001      | DY262452               | 1                | 70,61                            | 20040617                         | 171 - 175            | 171 - 171 | [92]                      |
| CiC5950-02   | ET083949               | 1                | 91,37                            | 25122291                         | GA                   | GG        | [37]                      |
| CID6193      | ET085125               | 1                | 92,22                            | 25132488                         | 176 - 185            | 176 - 176 | [94]                      |
| CiC0599-01   | ET093125               | 1                | 102,39                           | 27107805                         | GA                   | GG        | [37]                      |
| JK-taa15     | none                   | 1                | 119,73                           | 28183310                         | 189 - 192            | 189 - 204 | [91]                      |
| mCrCIR02D09  | FR677569               | 2                | 11,37                            | 5821301                          | 231 - 238            | 229 - 231 | [24]                      |
| CiC5785-01   | ET082673               | 2                | 44,73                            | 11235057                         | TA                   | TT        | [37]                      |
| Cx2004       | CF653229               | 2                | 46,67                            | 11397075                         | 200 - 204            | 204 - 204 | [87]                      |
| Cx6F23       | CF417259               | 2                | 49,53                            | 11488134                         | 149 - 162            | 162 - 168 | [86]                      |
| CiC6278-01   | ET085551               | 2                | 57,01                            | 20807016                         | CA                   | AA        | [37]                      |
| CiC3440-07   | ET077539               | 2                | 67,22                            | 24636345                         | GA                   | GG        | [37]                      |
| mCrCIR07D05  | FR677574               | 2                | 75,6                             | 26516983                         | 188 - 190            | 186 - 188 | [24]                      |
| mCrCIR03C08  | FR677576               | 2                | 82,19                            | 27340389                         | 207 - 226            | 207 - 208 | [24]                      |
| CIBE6006     | ET084205               | 2                | 124,01                           | 34151440                         | 176 - 201            | 197 - 201 | [93]                      |
| mCrCIR05A05  | FR677580               | 2                | 125,24                           | 34232586                         | 144 - 153            | 153 - 164 | [24]                      |
| JK-taa41     | none                   | 2                | 131,86                           | 35861149                         | 146 - 154            | 154 - 160 | [91]                      |
| MEST369      | DY272147               | 3                | 20                               | 3587345                          | 153 - 157            | 153 - 160 | In preparation            |
| MEST370      | DY295074               | 3                | 50,54                            | 6159065                          | 181 - 184            | 181 - 181 | In preparation            |
| CID6314      | ET085782               | 3                | 65,71                            | 7424910                          | 231 - 240            | 240 - 240 | [94]                      |
| CID6286      | ET085618               | 3                | 74,76                            | 9132118                          | 365 - 384            | 365 - 365 | [94]                      |
| CIBE4225     | ET081679               | 3                | 86,33                            | 32288952                         | 132 - 144            | 132 - 132 | This paper 2              |
| CID5376      | ET113309               | 3                | 88,24                            | 12826450                         | 169 - 174            | 174 - 174 | [94]                      |
| MEST470      | DY290454               | 3                | 88,76                            | 11399251                         | 255 - 257            | 255 - 255 | In preparation            |
| CiC0868-01   | ET095107               | 3                | 102,81                           | 38496917                         | CT                   | CC        | [37]                      |
| CX0124       | CN187496               | 3                | 110,28                           | 41286578                         | 181 - 190            | 181 - 181 | Chen et al In preparation |
| CID4894      | ET080676               | 3                | 116,28                           | 42870140                         | 220 - 227            | 220 - 220 | [94]                      |
| MEST131      | DY276912               | 3                | 179,33                           | 50550369                         | 141 - 147            | 141 - 141 | [89]                      |
| CiC4240-04   | ET106812               | 4                | 7,09                             | 2315148                          | GA                   | GG        | [37]                      |
| CiC1757-02   | ET097717               | 4                | 12,05                            | 3714825                          | CA                   | CC        | [37]                      |
| CiC5261-01   | ET112543               | 4                | 16,65                            | 7935718                          | TA                   | TT        | [37]                      |
| CiC2840-01   | ET103429               | 4                | 16,96                            | 9827893                          | CT                   | TT        | [37]                      |
| CiC2824-01   | ET103336               | 4                | 22,97                            | 14673848                         | AG                   | AA        | [37]                      |
| CF-ACA01     | CN181701.1             | 4                | 24,41                            | 14526637                         | 336 - 339            | 336 - 336 | In preparation            |
| CiC3740-02   | ET079647               | 4                | 43,95                            | 18980142                         | GC                   | CC        | [37]                      |
| MEST146      | DY278930               | 4                | 65,61                            | 22394239                         | 231 - 237            | 231 - 231 | In preparation            |
| mCrCIR03G05  | FR677578               | 4                | 75,06                            | 23443938                         | 226 - 229            | 226 - 226 | [24]                      |
| CiC0446-01   | ET091387               | 4                | 77,76                            | 23905799                         | TA                   | TT        | [37]                      |
| CiC6213-07   | ET085253               | 4                | 84,53                            | 24871638                         | GA                   | GG        | [37]                      |
| mCrCIR02D04b | FR677564               | 4                | 85,74                            | 25569961                         | 200 - 210            | 200 - 230 | [90]                      |
| CIBE3255     | ET076159               | 4                | 89,49                            | 24918812                         | 205 - 210            | 210 - 210 | [93]                      |
| CiC4954-02   | ET081013               | 5                | 8,41                             | 1604845                          | GA                   | GG        | [37]                      |
| CiC5327-03   | ET113032               | 5                | 14,9                             | 6430315                          | CT                   | CC        | [37]                      |
| CID0245      | ET089411               | 5                | 20,94                            | 22294452                         | 209 - 216            | 216 - 216 | This paper 3              |
| CiC1380-05   | ET072553               | 5                | 22,42                            | 10987419                         | TC                   | CC        | [37]                      |
| CiC1135-01   | ET069608               | 5                | 32,96                            | 29766765                         | GA                   | AA        | [37]                      |
| MEST104      | DY273697               | 5                | 40,46                            | 32963594                         | 238 - 242            | 236 - 238 | [89]                      |
| CiC5788-16   | ET082679               | 5                | 41,54                            | 33591652                         | GA                   | AA        | [37]                      |

|              |          |   |        |          |           |            |                |
|--------------|----------|---|--------|----------|-----------|------------|----------------|
| Cx6F06       | CK933007 | 5 | 60,5   | 35908207 | 150 - 153 | 150 - 150  | [86]           |
| CiC5842-02   | ET083106 | 5 | 77,34  | 37109366 | CA        | CC         | [37]           |
| CID2493      | ET101792 | 5 | 96,68  | 38674890 | 173 - 178 | 169 - 171  | [94]           |
| mCrCIR06A12  | AM489742 | 5 | 98,71  | 39956736 | 97 - 102  | 97 - 97    | [88]           |
| CID5485      | ET113963 | 5 | 107,43 | 41715026 | 229 - 235 | 229 - 229  | [94]           |
| Cx6F03       | DR912164 | 5 | 108,4  | 42010039 | 254 - 260 | 248 - 248  | [86]           |
| CiC2417-04   | ET101382 | 5 | 108,94 | 41973469 | TA        | TT         | [37]           |
| CiC2635-06   | ET102138 | 6 | 6,38   | 9585251  | AG        | GG         | [37]           |
| CiC4033-01   | ET105470 | 6 | 7,04   | 8322694  | TA        | TT         | [37]           |
| MEST191      | DY283044 | 6 | 10,86  | 11114011 | 241 - 243 | 235 - 243  | In preparation |
| CiC4993-03   | ET081280 | 6 | 13,95  | 12258804 | CT        | CC         | [37]           |
| MEST132      | DY276930 | 6 | 26,93  | 15158795 | 235 - 262 | 235 - 244  | [85]           |
| MEST346      | DY291500 | 6 | 56,94  | 19933128 | 277 - 297 | 297 - 297  | In preparation |
| CiC2128-01   | ET111354 | 6 | 61,19  | 19377331 | CA        | CC         | [37]           |
| MEST322      | DY297861 | 6 | 70,14  | 21781641 | 164 - 180 | 180 - 180  | In preparation |
| CiC3056-02   | ET075329 | 6 | 72,51  | 22086724 | GA        | AA         | [37]           |
| CID5874      | ET083265 | 6 | 73,33  | 22257939 | 376 - 382 | 382 - 392  | [94]           |
| mCrCIR01C06  | FR692356 | 6 | 88,92  | 24791517 | 133 - 165 | 131 - 159  | [24]           |
| MEST123      | DY276100 | 6 | 91,98  | 25303966 | 253 - 281 | 253 - 270  | [85]           |
| MEST107      | DY274062 | 7 | 8,9    | 211621   | 176 - 184 | 176 - 176  | [89]           |
| CiC1444-03   | ET073216 | 7 | 13,6   | 562320   | CA        | CC         | [37]           |
| MEST473      | DY295492 | 7 | 15,77  | 784405   | 218 - 226 | Null - 228 | In preparation |
| MEST202      | DY284147 | 7 | 20,6   | 1941762  | 157 - 169 | Null - 169 | In preparation |
| CiC3674-02   | ET079224 | 7 | 23,56  | 2639362  | GA        | GG         | [37]           |
| CiC4877-04   | ET080581 | 7 | 24,68  | 2733388  | GA        | AA         | [37]           |
| CiC2401-02   | ET101266 | 7 | 46,63  | 7084364  | AG        | AA         | [37]           |
| mCrCIR03B07  | FR677573 | 7 | 83,39  | 11545990 | 264 - 266 | 266 - Null | [24]           |
| CiC3361-04   | ET076974 | 7 | 94,28  | 15356223 | GT        | GNull      | [37]           |
| Ci07C07      | AJ567409 | 7 | 98,02  | 15803823 | 228 - 240 | 225 - 240  | [88]           |
| CID0591      | ET093022 | 7 | 115,59 | 21089419 | 346 - 349 | Null - 355 | [94]           |
| CMS04        | none     | 8 | 3,54   | 21700    | 173 - 189 | Null - 189 | [84]           |
| mCrCIR01F04a | AM489736 | 8 | 5,92   | 1063542  | 187 - 203 | 208 - 222  | [88]           |
| CiC0640-03   | ET068363 | 8 | 12,79  | 1871233  | AG        | GG         | [37]           |
| mCrCIR07B05  | AM489747 | 8 | 31,7   | 3217225  | 203 - 222 | 217 - 220  | [88]           |
| MEST502      | DY266990 | 8 | 43,45  | 5153447  | 175 - 192 | 175 - 183  | In preparation |
| CiC1208-01   | ET070547 | 8 | 58,18  | 18991766 | GA        | GNull      | [37]           |
| CiC4853-01   | ET110900 | 8 | 65,28  | 22027045 | TC        | CN         | [37]           |
| mCrCIR02A09  | FR677568 | 8 | 98,63  | 24367691 | 159 - 161 | 151 - 161  | [24]           |
| CiC1749-05   | ET097636 | 8 | 102,98 | 24429013 | TG        | G0         | [37]           |
| CiC4790-02   | ET110402 | 8 | 106,12 | 24513683 | CT        | TT         | [37]           |
| Cx6F24       | CF418081 | 9 | 2,11   | 74436    | 138 - 144 | 138 - 138  | [86]           |
| CiC4876-07   | ET080580 | 9 | 2,69   | 143924   | TA        | AA         | [37]           |
| CiC5087-01   | ET111514 | 9 | 15,88  | 1955754  | AT        | AA         | [37]           |
| MEST494      | FC882340 | 9 | 28,97  | 2906699  | 280 - 285 | 275 - 280  | In preparation |
| mCrCIR07F11  | FR677567 | 9 | 49,57  | 4918314  | 153 - 160 | 160 - 164  | [90]           |
| CiC4620-07   | ET109292 | 9 | 54,17  | 23121885 | AG        | AN         | [37]           |
| CiC0046-02   | ET087154 | 9 | 63,72  | 28604292 | CG        | GG         | [37]           |
| CiC2768-01   | ET102921 | 9 | 73,33  | 29237063 | GT        | GG         | [37]           |
| CiC5089-06   | ET111533 | 9 | 80,77  | 29866487 | CT        | CC         | [37]           |

1: Alleles. The numbers indicate the size of alleles in nucleotides for SSR markers, and letters correspond to SNP markers alleles. Null indicates null alleles.

2: Sequence of primers for SSR marker CIBE4225. Forward: GTGGAGCGATTTGACATT, and Reverse: CTCACAGCAACAACAACAAC.

3: Sequence of primers for SSR marker CID0245. Forward: TGTCTGTTGTTTTGGTGGCA, and Reverse: GGAAGCAATTATCCAAGCCA.

#### References

24. Cuenca J, Froelicher Y, Aleza P, Juarez J, Navarro L, Ollitrault P: **Multilocus half-tetrad analysis and centromere mapping in citrus: evidence of SDR mechanism for 2n megagametophyte production and partial chiasma interference in mandarin cv 'Fortune'**. *Heredity* 2011, 107: 462-470.

31. Ollitrault P, Terol J, Chen C, Federici CT, Lotfy S, Hippolyte I, Ollitrault F, Bérard A, Chauveau A, Cuenca J, Costantino G, Kacar Y, Mu L, Garcia-Lor A, Froelicher Y, Aleza P, Boland A, Billot C, Navarro L, Luro F, Roose ML, Gmitter FG, Talon M, Brunel D: **A reference genetic map of *C. clementina hort. ex Tan.*; citrus evolution inferences from comparative mapping**. *BMC Genomics* 13: 593.

32. Wu AG, Prochnik S, Jenkins J, Salse J, Hellsten U, Murat F, Perrier X, Ruiz M, Scalabrin S, Terol J, Takita MA, Labadie K, Poulain J, Couloux A, Jabbari K, Cattonaro F, Del Fabbro C, Pinosio S, Zuccolo A, Chapman J, Grimwood J, Tadeo FR, Estornell LH, Muñoz-Sanz JV, Ibañez V, Herrero-Ortega A, Aleza P, Pérez-Pérez J, Ramón D, Brunel D, Luro F, Chen C, Farmerie WG, Desany B, Kodira C, Mohiuddin M, Harkins T, Fredrikson K, Burns P, Lomsadze, Borodovsky M, Reforgiato G, Freitas-Astúa J, Quetier F, Navarro L, Roose M, Wincker P, Schmutz J, Morgante M, Machado MA, Talon M, Jaillon O, Ollitrault P, Gmitter F, Rokhsar D: **Sequencing of diverse mandarin, pummelo and orange genomes reveals complex history of admixture during citrus domestication.** *Nat Biotechnol* 2014, 32:656–662.
37. Ollitrault P, Terol J, Garcia-Lor A, Bérard A, Chauveau A, Froelicher Y, Belzile C, Morillon R, Navarro L, Brunel D, Talon M: **SNP mining in *C. clementina* BAC end sequences; transferability in the Citrus genus (Rutaceae), phylogenetic inferences and perspectives for genetic mapping.** *BMC Genomics* 2012, 10:13:13
84. Ahmad R, Struss D, Southwick SM: **Development and characterization of microsatellite markers in Citrus.** *J Am Soc Hort Sci* 2003, 128:584–590.
85. Aleza P, Froelicher Y, Schwarz S, Agusti M, Hernandez M, Juarez J, Luro F, Morillon R, Navarro L, Ollitrault P: **Tetraploidization events by chromosome doubling of nucellar cells are frequent in apomictic citrus and are dependent on genotype and environment.** *Ann Bot* 2011, 108(1):37-50.
86. Chen CX, Zhou P, Choi YA, Huang S, Gmitter FG Jr: **Mining and characterizing microsatellites from citrus ESTs.** *Theor Appl Genet* 2006, 112(7):1248-1257
87. Chen CX, Bowman KD, Choi YA, Dang PM, Rao MN, Huang S, Soneji JR, McCollum TG, Gmitter FG Jr: **EST-SSR genetic maps for Citrus sinensis and Poncirus trifoliata.** *Tree Genet Genomes* 2008, 4(1):1–10.
88. Froelicher Y, Dambier D, Bassene JB, Costantino G, Lotfy S, Didout C, Beaumont V, Brottier P, Risterucci AM, Luro F, Ollitrault P: **Characterization of microsatellite markers in mandarin orange (*Citrus reticulata* Blanco).** *Mol Ecol Resour* 2008, 8(1):119-122
89. Garcia-Lor A, Luro F, Navarro L, Ollitrault P: **Comparative use of InDel and SSR markers in deciphering the interspecific structure of cultivated citrus genetic diversity: a perspective for genetic association studies.** *Mol Genet Genomics* 2012, 287(1):77–94
90. Kamiri M, Stift M, Srairi I, Costantino G, El Moussadik A, Hmyene A, Bakry F, Ollitrault P, Froelicher Y: **Evidence for non-disomic inheritance in a Citrus interspecific tetraploid somatic hybrid between *C. reticulata* and *C. limon* using SSR markers and cytogenetic analysis.** *Plant Cell Rep* 2011, 30(8):1415-1425.
91. Kijas JMH, Thomas MR, Fowler JCS, Roose ML: **Integration of trinucleotide microsatellites into a linkage map of Citrus.** *Theor Appl Genet* 1997, 94(5):701-706.
92. Luro FL, Costantino G, Terol J, Argout X, Allario T, Wincker P, Talon M, Ollitrault P, Morillon R: **Transferability of the EST-SSRs developed on Nules clementine (*Citrus clementina* Hort ex Tan) to other Citrus species and their effectiveness for genetic mapping.** *BMC Genomics* 2008, 9:287.
93. Ollitrault F, Terol J, Pina JA, Navarro L, Talon M, Ollitrault P: **Development of SSR markers from Citrus clementina (Rutaceae) BAC end sequences and interspecific transferability in Citrus.** *Am J Bot* 2010, 97(11):e124–e129
94. Ollitrault F, Terol J, Alonso Martin A, Pina JA, Navarro L, Talon M, Ollitrault P: **Development of InDel markers from Citrus clementina (Rutaceae) BAC end sequences and interspecific transferability in Citrus.** *Am J Bot* 2012, 99(7):e268-e273.
