# Supplementary material for: Genetic mapping of centromeres in the nine Citrus clementina chromosomes using half-tetrad analysis and recombination patterns in unreduced and haploid gametes
Source: PubMed Central journal article supplement (PMC4367916; doi:10.1186/s12870-015-0464-y), 2015-03-08
Supplement: 12870_2015_464_MOESM2_ESM.pdf [file 12870_2015_464_MOESM2_ESM.pdf]

**Additional file 2.  $\chi^2$ -test for allelic segregation and heterozygosity restitution percentages (%HR) at each locus, LOD SDR/FDR for markers with HR < 50% and  $\chi^2$ -test for partial interference for markers with HR > 66.67% .**

| Marker       | LG | Allelic segregation |           | % HR  | LOD<br>SDR/FDR | Partial interference |           |
|--------------|----|---------------------|-----------|-------|----------------|----------------------|-----------|
|              |    | $\chi^2$            | p (value) |       |                | $\chi^2$             | p (value) |
| CIBE5720     | 1  | 0,95                | 0,33      | 2,30  | 22,05          |                      |           |
| CIBE6147     | 1  | 0,03                | 0,85      | 66,67 |                |                      |           |
| CiC0599-01   | 1  | 0,03                | 0,86      | 63,10 |                |                      |           |
| CiC2110-01   | 1  | 0,56                | 0,46      | 47,67 | 0,04           |                      |           |
| CiC4581-01   | 1  | 0,45                | 0,50      | 6,98  | 16,63          |                      |           |
| CiC4827-01   | 1  | 0,12                | 0,73      | 60,47 |                |                      |           |
| CiC5950-02   | 1  | 1,45                | 0,23      | 49,43 | 0,00           |                      |           |
| CiD0806      | 1  | 0,76                | 0,38      | 3,45  | 20,52          |                      |           |
| CiD6193      | 1  | 1,14                | 0,29      | 50,57 |                |                      |           |
| JK-taa15     | 1  | 0,04                | 0,84      | 71,26 |                | 0,95                 | 0,33      |
| MEST001      | 1  | 0,06                | 0,81      | 19,54 | 7,53           |                      |           |
| MEST057      | 1  | 1,19                | 0,28      | 37,93 | 1,11           |                      |           |
| MEST539      | 1  | 0,74                | 0,39      | 1,15  | 23,82          |                      |           |
| CIBE6006     | 2  | 2,33                | 0,13      | 75,86 |                | 3,80                 | 0,05      |
| CiC3440-07   | 2  | 0,05                | 0,82      | 11,63 | 12,61          |                      |           |
| CiC5785-01   | 2  | 0,13                | 0,71      | 20,24 | 7,16           |                      |           |
| CiC6278-01   | 2  | 0,42                | 0,52      | 0,00  | 1,00           |                      |           |
| Cx2004       | 2  | 0,05                | 0,82      | 14,94 | 10,26          |                      |           |
| Cx6F23       | 2  | 0,12                | 0,73      | 13,79 | 10,78          |                      |           |
| JK-taa41     | 2  | 0,43                | 0,51      | 75,86 |                | 3,80                 | 0,05      |
| mCrCIR02D09  | 2  | 2,46                | 0,12      | 70,11 |                | 0,54                 | 0,46      |
| mCrCIR03C08  | 2  | 0,67                | 0,41      | 37,93 | 1,11           |                      |           |
| mCrCIR05A05  | 2  | 3,86                | 0,05      | 75,86 |                | 3,80                 | 0,05      |
| mCrCIR07D05  | 2  | 1,00                | 0,32      | 26,44 | 4,32           |                      |           |
| CiC0868-01   | 3  | 0,69                | 0,41      | 16,47 | 9,29           |                      |           |
| CiD4225      | 3  | 0,30                | 0,58      | 4,60  | 19,14          |                      |           |
| CiD4894      | 3  | 0,16                | 0,69      | 36,78 | 1,34           |                      |           |
| CiD5376      | 3  | 0,43                | 0,51      | 3,45  | 20,52          |                      |           |
| CiD6286      | 3  | 0,80                | 0,37      | 8,05  | 15,26          |                      |           |
| CiD6314      | 3  | 3,38                | 0,07      | 33,33 | 2,07           |                      |           |
| CX0124       | 3  | 0,75                | 0,39      | 24,42 | 5,19           |                      |           |
| MEST131      | 3  | 0,43                | 0,51      | 75,86 |                | 3,80                 | 0,05      |
| MEST369      | 3  | 2,67                | 0,10      | 72,41 |                | 1,49                 | 0,22      |
| MEST370      | 3  | 6,15                | 0,01      | 45,98 | 0,12           |                      |           |
| MEST470      | 3  | 0,43                | 0,51      | 2,33  | 21,76          |                      |           |
| CF-ACA01     | 4  | 0,11                | 0,74      | 9,20  | 14,25          |                      |           |
| CIBE3255     | 4  | 0,89                | 0,35      | 79,31 |                | 7,19                 | 0,01      |
| CiC0446-01   | 4  | 2,00                | 0,16      | 79,31 |                | 7,19                 | 0,01      |
| CiC1757-02   | 4  | 1,35                | 0,25      | 13,95 | 10,67          |                      |           |
| CiC2635-06   | 4  | 0,76                | 0,38      | 1,18  | 23,77          |                      |           |
| CiC2824-01   | 4  | 0,82                | 0,37      | 8,24  | 15,09          |                      |           |
| CiC2840-01   | 4  | 0,98                | 0,32      | 2,35  | 21,73          |                      |           |
| CiC3740-02   | 4  | 0,08                | 0,78      | 38,82 | 0,92           |                      |           |
| CiC4240-04   | 4  | 0,91                | 0,34      | 17,65 | 8,48           |                      |           |
| CiC5261-01   | 4  | 0,98                | 0,32      | 2,35  | 21,73          |                      |           |
| CiC6213-07   | 4  | 0,89                | 0,35      | 79,31 |                | 7,19                 | 0,01      |
| mCrCIR02D04b | 4  | 1,32                | 0,25      | 78,16 |                | 5,95                 | 0,01      |

|              |   |      |      |       |       |       |      |
|--------------|---|------|------|-------|-------|-------|------|
| mCrCIR03G05  | 4 | 1,67 | 0,20 | 82,76 |       | 11,65 | 0,00 |
| MEST146      | 4 | 1,81 | 0,18 | 68,97 |       | 0,24  | 0,63 |
| CiC1135-01   | 5 | 0,06 | 0,81 | 14,29 | 10,69 |       |      |
| CiC1380-05   | 5 | 0,01 | 0,91 | 1,16  | 23,52 |       |      |
| CiC2417-04   | 5 | 0,67 | 0,41 | 71,76 |       | 1,17  | 0,28 |
| CiC4954-02   | 5 | 0,40 | 0,53 | 22,22 | 6,18  |       |      |
| CiC5327-03   | 5 | 0,00 | 1,00 | 6,98  | 16,44 |       |      |
| CiC5788-16   | 5 | 0,15 | 0,70 | 24,69 | 4,96  |       |      |
| CiC5842-02   | 5 | 0,13 | 0,72 | 62,79 |       |       |      |
| CID0245      | 5 | 0,05 | 0,83 | 5,75  | 17,88 |       |      |
| CID2493      | 5 | 0,33 | 0,56 | 68,97 |       | 0,24  | 0,63 |
| CID5485      | 5 | 1,09 | 0,30 | 73,56 |       | 2,14  | 0,14 |
| Cx6F03       | 5 | 0,36 | 0,55 | 71,26 |       | 0,95  | 0,33 |
| Cx6F06       | 5 | 0,03 | 0,87 | 56,32 |       |       |      |
| mCrCIR06A12  | 5 | 0,18 | 0,67 | 74,71 |       | 2,91  | 0,09 |
| MEST104      | 5 | 0,01 | 0,90 | 22,99 | 5,82  |       |      |
| CiC2128-01   | 6 | 0,33 | 0,56 | 68,24 |       | 0,11  | 0,74 |
| CiC3056-02   | 6 | 2,46 | 0,12 | 70,11 |       | 0,54  | 0,46 |
| CiC4033-01   | 6 | 0,76 | 0,38 | 2,41  | 20,39 |       |      |
| CiC4993-03   | 6 | 0,44 | 0,51 | 2,50  | 21,52 |       |      |
| CID5874      | 6 | 1,81 | 0,18 | 67,86 |       | 0,06  | 0,80 |
| mCrCIR01C06  | 6 | 3,85 | 0,05 | 70,11 |       | 0,54  | 0,46 |
| MEST123      | 6 | 6,53 | 0,01 | 65,12 |       |       |      |
| MEST132      | 6 | 2,20 | 0,14 | 36,78 | 1,32  |       |      |
| MEST191      | 6 | 0,44 | 0,51 | 4,65  | 19,08 |       |      |
| MEST322      | 6 | 1,81 | 0,18 | 68,97 |       | 0,24  | 0,63 |
| MEST346      | 6 | 0,67 | 0,41 | 72,41 |       | 1,49  | 0,22 |
| Ci07C07      | 7 | 2,71 | 0,10 | 4,60  | 19,14 |       |      |
| CiC1444-03   | 7 | 0,04 | 0,85 | 68,60 |       | 0,17  | 0,68 |
| CiC2401-02   | 7 | 0,43 | 0,51 | 74,70 |       | 2,90  | 0,09 |
| CiC3361-04   | 7 | 2,78 | 0,10 | 4,71  | 18,80 |       |      |
| CiC3674-02   | 7 | 1,00 | 0,32 | 70,93 |       | 0,82  | 0,37 |
| CiC4877-04   | 7 | 1,38 | 0,24 | 69,05 |       | 0,26  | 0,61 |
| CID0591      | 7 | 4,59 | 0,03 | 27,59 | 3,93  |       |      |
| mCrCIR03B07  | 7 | 1,29 | 0,26 | 27,59 | 3,84  |       |      |
| MEST107      | 7 | 0,67 | 0,41 | 72,41 |       | 1,49  | 0,22 |
| MEST202      | 7 | 0,00 | 1,00 | 70,11 |       | 0,54  | 0,46 |
| MEST473      | 7 | 0,62 | 0,43 | 69,41 |       | 0,34  | 0,56 |
| CiC0640-03   | 8 | 0,03 | 0,87 | 54,65 |       |       |      |
| CiC1208-01   | 8 | 0,00 | 1,00 | 5,88  | 17,74 |       |      |
| CiC1749-05   | 8 | 1,29 | 0,26 | 67,06 |       | 0,01  | 0,93 |
| CiC4790-02   | 8 | 1,38 | 0,24 | 67,50 |       | 0,03  | 0,86 |
| CiC4853-01   | 8 | 3,60 | 0,06 | 45,35 | 0,16  |       |      |
| CMS04        | 8 | 0,33 | 0,56 | 68,97 |       | 0,24  | 0,63 |
| mCrCIR01F04a | 8 | 0,03 | 0,85 | 65,88 |       |       |      |
| mCrCIR02A09  | 8 | 0,36 | 0,55 | 71,26 |       | 0,95  | 0,33 |
| mCrCIR07B05  | 8 | 2,05 | 0,15 | 32,18 | 2,45  |       |      |
| MEST502      | 8 | 0,34 | 0,56 | 16,09 | 9,30  |       |      |
| CiC0046-02   | 9 | 3,26 | 0,07 | 19,77 | 7,32  |       |      |
| CiC2768-01   | 9 | 3,07 | 0,08 | 34,52 | 1,80  |       |      |
| CiC4620-07   | 9 | 2,33 | 0,13 | 2,33  | 21,51 |       |      |
| CiC4876-07   | 9 | 2,25 | 0,13 | 81,61 |       | 10,05 | 0,00 |
| CiC5087-01   | 9 | 6,00 | 0,01 | 71,08 |       | 0,88  | 0,35 |
| CiC5089-06   | 9 | 2,27 | 0,13 | 47,62 | 0,04  |       |      |
| Cx6F24       | 9 | 0,53 | 0,47 | 80,46 |       | 8,56  | 0,00 |
| mCrCIR07F11  | 9 | 2,71 | 0,10 | 3,45  | 20,52 |       |      |
| MEST494      | 9 | 1,45 | 0,23 | 49,43 | 0,00  |       |      |
