# Supplementary material for: Genetic mapping of centromeres in the nine Citrus clementina chromosomes using half-tetrad analysis and recombination patterns in unreduced and haploid gametes
Source: PubMed Central journal article supplement (PMC4367916; doi:10.1186/s12870-015-0464-y), 2015-03-08
Supplement: 12870_2015_464_MOESM3_ESM.pdf [file 12870_2015_464_MOESM3_ESM.pdf]

Additional file 3. Analysis at individual level of the origin (SDR/FDR) of clementine 2n gametes. For each of the nine LGs, we selected the marker closest to the estimated position of the centromere and computed the LOD of the probability of the individual multilocus allelic configuration under SDR/FDR hypotheses (Cuenca et al., [24]). No more than one marker in heterozygosity was observed for each individual and the LOD value supported SDR as the origin of the 2n gamete.

| Closest marker to the centromere  | MEST539                                     | CiC6278-01 | MEST470 | CiC2840-01 | CiC1380-05 | CiC2635-06 | Ci07C07 | CiC1208-01 | CiC4620-07 |               |
|-----------------------------------|---------------------------------------------|------------|---------|------------|------------|------------|---------|------------|------------|---------------|
| LG                                | 1                                           | 2          | 3       | 4          | 5          | 6          | 7       | 8          | 9          |               |
| Centromere Position (M)           | 0,6066                                      | 0,5687     | 0,9059  | 0,1614     | 0,2312     | 0,064      | 0,9643  | 0,5421     | 0,5216     |               |
| Marker Position (M)               | 0,61822                                     | 0,57009    | 0,88762 | 0,16963    | 0,22421    | 0,06382    | 0,98019 | 0,58182    | 0,54172    |               |
| Marker distance to centromere (M) | 0,01162                                     | 0,00139    | 0,01828 | 0,00823    | 0,00699    | 0,00018    | 0,01589 | 0,03972    | 0,02012    |               |
| Individuals analyzed              | Individual multilocus allelic configuration |            |         |            |            |            |         |            |            | LOD (SDR/FDR) |
| 1                                 | HO                                          | HO         | HO      | HO         | HO         | HO         | HO      | HO         | HO         | 20,27         |
| 2                                 | HO                                          | HO         | HE      | HO         |            | HO         | HO      | HO         | HO         | 14,65         |
| 3                                 | HO                                          | HO         | HO      | HO         | HO         | HO         | HO      | HO         | HO         | 20,27         |
| 4                                 | HO                                          | HO         | HO      | HO         |            | HO         | HO      | HO         | HO         | 18,01         |
| 5                                 | HO                                          | HO         | HO      | HO         | HO         | HO         | HE      | HO         | HO         | 16,79         |
| 6                                 | HO                                          | HO         | HO      | HO         | HO         | HO         | HO      | HO         | HO         | 20,27         |
| 7                                 | HO                                          | HO         | HO      | HO         | HO         | HO         | HO      | HO         | HO         | 20,27         |
| 8                                 | HO                                          | HO         | HO      | HO         | HO         | HO         | HO      | HO         | HO         | 20,27         |
| 9                                 | HO                                          | HO         | HO      | HO         | HO         | HO         | HO      |            | HO         | 18,82         |
| 10                                | HO                                          | HO         | HO      | HO         | HO         | HO         | HE      | HO         | HO         | 16,79         |
| 11                                | HO                                          | HO         | HO      | HO         | HO         | HO         | HE      | HO         | HO         | 16,79         |
| 12                                | HO                                          | HO         | HO      | HO         | HO         | HO         | HO      | HO         | HO         | 20,27         |
| 13                                | HO                                          | HO         | HO      | HO         | HO         | HO         | HO      | HO         | HO         | 20,27         |
| 14                                | HO                                          | HO         | HO      | HO         | HO         | HO         | HO      | HO         | HO         | 20,27         |
| 15                                | HO                                          | HO         | HO      | HO         | HO         | HO         | HO      | HO         | HO         | 20,27         |
| 16                                | HO                                          | HO         | HO      | HO         | HO         | HO         | HO      | HO         | HO         | 20,27         |
| 17                                | HO                                          | HO         | HO      | HO         | HO         | HO         | HO      | HO         | HO         | 20,27         |
| 18                                | HO                                          | HO         | HO      | HO         | HO         | HO         | HO      | HO         | HO         | 20,27         |
| 19                                | HO                                          | HO         | HO      | HO         | HO         | HO         | HO      | HO         | HO         | 20,27         |
| 20                                | HO                                          | HO         | HO      | HO         | HO         | HO         | HO      | HO         | HO         | 20,27         |
| 21                                | HO                                          | HO         | HO      | HO         | HO         | HO         | HO      | HO         | HO         | 20,27         |
| 22                                | HO                                          | HO         | HO      | HO         | HO         | HO         | HO      | HO         | HO         | 20,27         |
| 23                                | HO                                          | HO         | HO      | HO         | HO         | HO         | HO      | HO         | HO         | 20,27         |
| 24                                | HO                                          | HO         | HO      | HO         | HO         | HO         | HO      | HO         | HO         | 20,27         |
| 25                                | HO                                          | HO         | HO      | HO         | HO         | HO         | HO      | HE         | HO         | 17,66         |
| 26                                | HO                                          | HO         | HO      | HO         | HO         | HO         | HO      | HO         | HO         | 20,27         |
| 27                                | HO                                          | HO         | HO      | HO         | HO         | HO         | HO      | HO         | HO         | 20,27         |
| 28                                | HO                                          | HO         | HO      | HO         | HO         | HO         | HO      | HO         | HO         | 20,27         |
| 29                                | HO                                          | HO         | HO      | HO         | HO         | HO         | HO      | HE         | HO         | 17,66         |
| 30                                | HO                                          | HO         | HO      | HO         | HO         | HO         | HO      | HO         | HO         | 20,27         |
| 31                                | HO                                          | HO         | HO      | HO         | HO         | HO         | HO      | HO         | HO         | 20,27         |
| 32                                | HO                                          | HO         | HO      | HO         | HO         | HO         | HO      | HO         | HO         | 20,27         |
| 33                                | HO                                          | HO         | HO      | HO         | HO         | HO         | HO      | HO         | HO         | 20,27         |
| 34                                | HO                                          | HO         | HO      |            | HO         | HO         | HO      | HO         | HO         | 18,08         |
| 35                                | HO                                          | HO         | HO      | HO         | HO         | HO         | HO      | HO         | HO         | 20,27         |
| 36                                | HO                                          | HO         |         | HO         | HO         | HO         | HO      | HE         | HO         | 15,84         |
| 37                                | HO                                          | HO         | HO      | HO         | HO         | HO         | HO      | HO         | HO         | 20,27         |
| 38                                | HO                                          | HO         | HO      | HO         | HO         | HO         | HO      | HO         | HO         | 20,27         |
| 39                                | HO                                          | HO         | HO      | HO         | HO         | HO         | HO      | HO         | HO         | 20,27         |
| 40                                | HO                                          | HO         | HO      | HO         | HO         | HO         | HO      | HO         | HO         | 20,27         |
| 41                                | HO                                          | HO         | HO      | HO         | HO         | HO         | HO      | HO         | HO         | 20,27         |
| 42                                | HO                                          | HO         | HO      | HO         | HO         | HO         | HO      | HO         | HO         | 20,27         |
| 43                                | HO                                          | HO         | HO      | HO         | HO         | HO         | HO      | HO         | HO         | 20,27         |
| 44                                | HO                                          | HO         | HE      | HO         | HO         | HO         | HO      | HO         | HO         | 16,92         |
| 45                                | HO                                          | HO         | HO      | HO         | HO         | HE         | HO      | HO         | HO         | 12,84         |
| 46                                | HO                                          | HO         | HO      | HO         | HO         | HO         | HO      | HO         | HO         | 20,27         |
| 47                                | HO                                          | HO         | HO      | HE         | HO         | HO         | HO      | HO         | HO         | 16,19         |
| 48                                | HE                                          | HO         | HO      | HO         | HO         | HO         | HO      | HO         | HO         | 16,50         |
| 49                                | HO                                          | HO         | HO      | HO         | HO         | HO         | HO      | HO         | HO         | 20,27         |
| 50                                | HO                                          | HO         | HO      | HO         | HO         | HO         | HO      | HO         | HO         | 20,27         |
| 51                                | HO                                          | HO         | HO      | HE         | HO         | HO         | HO      | HO         | HO         | 16,19         |
| 52                                | HO                                          | HO         | HO      | HO         | HO         | HO         | HO      | HO         | HE         | 17,01         |
| 53                                | HO                                          | HO         | HO      | HO         | HO         | HO         | HO      | HO         | HO         | 20,27         |
| 54                                | HO                                          | HO         | HO      | HO         | HO         | HO         | HO      | HO         | HO         | 20,27         |
| 55                                | HO                                          | HO         | HO      | HO         | HO         | HO         | HO      | HO         | HO         | 20,27         |
| 56                                | HO                                          | HO         | HO      | HO         | HO         | HO         | HO      | HO         | HO         | 20,27         |
| 57                                | HO                                          | HO         | HO      | HO         | HO         | HO         | HO      | HO         | HO         | 20,27         |
| 58                                | HO                                          | HO         | HO      | HO         | HO         | HO         | HO      | HO         | HO         | 20,27         |
| 59                                | HO                                          | HO         | HO      | HO         | HO         | HO         | HO      | HO         | HO         | 20,27         |
| 60                                | HO                                          | HO         | HO      | HO         | HO         | HO         | HO      | HE         | HO         | 17,66         |
| 61                                | HO                                          | HO         | HO      | HO         | HO         | HO         | HO      | HO         | HO         | 20,27         |
| 62                                | HO                                          | HO         | HO      |            | HO         | HO         | HO      | HO         | HO         | 18,08         |
| 63                                | HO                                          | HO         | HO      | HO         | HO         | HO         | HO      | HO         | HO         | 20,27         |
| 64                                | HO                                          | HO         | HO      | HO         | HO         | HO         | HO      | HO         | HO         | 20,27         |
| 65                                | HO                                          | HO         | HO      | HO         | HO         | HO         | HO      | HO         | HO         | 20,27         |
| 66                                | HO                                          | HO         |         | HO         | HO         | HO         | HO      | HO         | HO         | 18,45         |
| 67                                | HO                                          | HO         | HO      | HO         | HO         | HO         | HO      | HO         | HO         | 20,27         |
| 68                                | HO                                          | HO         | HO      | HO         | HO         | HO         | HO      | HO         | HO         | 20,27         |
| 69                                | HO                                          | HO         | HO      | HO         | HO         | HO         | HO      | HO         | HO         | 20,27         |
| 70                                | HO                                          | HO         | HO      | HO         | HO         | HO         | HO      | HO         | HO         | 20,27         |
| 71                                | HO                                          | HO         | HO      | HO         | HO         | HO         | HO      | HO         | HO         | 20,27         |
| 72                                | HO                                          | HO         | HO      | HO         | HO         | HO         | HO      | HO         | HE         | 17,01         |
| 73                                | HO                                          | HO         | HO      | HO         | HO         | HO         | HO      | HO         | HO         | 20,27         |
| 74                                | HO                                          | HO         | HO      | HO         | HO         | HO         | HO      | HO         | HO         | 20,27         |
| 75                                | HO                                          | HO         | HO      | HO         | HO         | HO         | HO      | HO         | HO         | 20,27         |
| 76                                | HO                                          | HO         | HO      | HO         | HO         | HO         | HO      | HO         | HO         | 20,27         |
| 77                                | HO                                          | HO         | HO      | HO         | HO         | HO         | HO      | HO         | HO         | 20,27         |
| 78                                | HO                                          | HO         | HO      | HO         | HO         | HO         | HO      | HO         | HO         | 20,27         |
| 79                                | HO                                          | HO         | HO      | HO         | HE         | HO         | HO      | HO         | HO         | 16,04         |
| 80                                | HO                                          | HO         | HO      | HO         | HO         | HO         | HO      | HO         | HO         | 20,27         |
| 81                                | HO                                          | HO         | HO      | HO         | HO         | HO         | HO      | HE         | HO         | 17,66         |
| 82                                | HO                                          | HO         | HO      | HO         | HO         | HO         | HO      | HO         | HO         | 20,27         |
| 83                                | HO                                          | HO         | HO      | HO         | HO         | HO         | HO      | HO         | HO         | 20,27         |
| 84                                | HO                                          | HO         | HO      | HO         | HO         | HO         | HE      | HO         | HO         | 16,79         |
| 85                                | HO                                          | HO         | HO      | HO         | HO         | HO         | HO      | HO         | HO         | 20,27         |
| 86                                | HO                                          | HO         | HO      | HO         | HO         | HO         | HO      | HO         | HO         | 20,27         |
| 87                                | HO                                          |            |         |            |            |            | HO      |            |            | 3,92          |

Population LOD 1669,28

M. Morgans  
HO. Homozygous  
HE. Heterozygous
