# Supplementary material for: Genetic mapping of centromeres in the nine Citrus clementina chromosomes using half-tetrad analysis and recombination patterns in unreduced and haploid gametes
Source: PubMed Central journal article supplement (PMC4367916; doi:10.1186/s12870-015-0464-y), 2015-03-08
Supplement: 12870_2015_464_MOESM5_ESM.pdf [file 12870_2015_464_MOESM5_ESM.pdf]

**Additional file 5. Heterozygous and homozygous profiles for 2n gametes analysed by HTA using four markers flanking the position of the centromere in each LG. N: Number of triploid hybrids for each profile; M: Name of the molecular marker; HR%: Heterozygosity restitution value; HE: Heterozygous; HO: Homozygous.**

| LG1 |         |          |         |            | LG2 |        |        |            |            | LG3 |         |         |         |            |
|-----|---------|----------|---------|------------|-----|--------|--------|------------|------------|-----|---------|---------|---------|------------|
| N   | CiD0806 | CiBE5720 | MEST539 | CiC4581-01 | N   | Cx2004 | Cx6F23 | CiC6278-01 | CiC3440-07 | N   | CiD4225 | CiD5376 | MEST470 | CiC0868-01 |
|     | M1      | M2       | M3      | M4         |     | M1     | M2     | M3         | M4         |     | M1      | M2      | M3      | M4         |
| 0   | HE      | HE       | HE      | HE         | 0   | HE     | HE     | HE         | HE         | 0   | HE      | HE      | HE      | HE         |
| 0   | HE      | HE       | HE      | HO         | 0   | HE     | HE     | HE         | HO         | 0   | HE      | HE      | HE      | HO         |
| 0   | HE      | HE       | HO      | HE         | 1   | HE     | HE     | HO         | HE         | 0   | HE      | HE      | HO      | HE         |
| 0   | HE      | HO       | HE      | HE         | 0   | HE     | HO     | HE         | HE         | 0   | HE      | HO      | HE      | HE         |
| 0   | HO      | HE       | HE      | HE         | 0   | HO     | HE     | HE         | HE         | 0   | HO      | HE      | HE      | HE         |
| 1   | HE      | HE       | HO      | HO         | 11  | HE     | HE     | HO         | HO         | 1   | HE      | HE      | HO      | HO         |
| 0   | HE      | HO       | HE      | HO         | 0   | HE     | HO     | HE         | HO         | 1   | HE      | HO      | HE      | HO         |
| 0   | HE      | HO       | HO      | HE         | 0   | HE     | HO     | HO         | HE         | 0   | HE      | HO      | HO      | HE         |
| 1   | HO      | HO       | HE      | HE         | 0   | HO     | HO     | HE         | HE         | 0   | HO      | HO      | HE      | HE         |
| 0   | HO      | HE       | HO      | HE         | 0   | HO     | HE     | HO         | HE         | 0   | HO      | HE      | HO      | HE         |
| 0   | HO      | HE       | HE      | HO         | 0   | HO     | HE     | HE         | HO         | 1   | HO      | HE      | HE      | HO         |
| 5   | HO      | HO       | HO      | HE         | 9   | HO     | HO     | HO         | HE         | 13  | HO      | HO      | HO      | HE         |
| 0   | HO      | HO       | HE      | HO         | 0   | HO     | HO     | HE         | HO         | 0   | HO      | HO      | HE      | HO         |
| 1   | HO      | HE       | HO      | HO         | 0   | HO     | HE     | HO         | HO         | 1   | HO      | HE      | HO      | HO         |
| 2   | HE      | HO       | HO      | HO         | 1   | HE     | HO     | HO         | HO         | 2   | HE      | HO      | HO      | HO         |
| 76  | HO      | HO       | HO      | HO         | 64  | HO     | HO     | HO         | HO         | 65  | HO      | HO      | HO      | HO         |
| 86  |         |          |         |            | 86  |        |        |            |            | 84  |         |         |         |            |
| HR% | 3,45    | 2,30     | 1,15    | 6,98       |     | 14,94  | 13,79  | 0,00       | 11,63      |     | 4,60    | 3,45    | 2,33    | 16,47      |

| LG4 |            |            |            |          | LG5 |            |         |            |            | LG6 |            |            |         |            |
|-----|------------|------------|------------|----------|-----|------------|---------|------------|------------|-----|------------|------------|---------|------------|
| N   | CiC1757-02 | CiC2840-01 | CiC2824-01 | CF-ACA01 | N   | CiC5327-03 | CiD0245 | CiC1380-05 | CiC1135-01 | N   | CiC2635-06 | CiC4033-01 | MEST191 | CiC4993-03 |
|     | M1         | M2         | M3         | M4       |     | M1         | M2      | M3         | M4         |     | M1         | M2         | M3      | M4         |
| 2   | HE         | HE         | HE         | HE       | 1   | HE         | HE      | HE         | HE         | 0   | HE         | HE         | HE      | HE         |
| 0   | HE         | HE         | HE         | HO       | 0   | HE         | HE      | HE         | HO         | 0   | HE         | HE         | HE      | HO         |
| 0   | HE         | HE         | HO         | HE       | 0   | HE         | HE      | HO         | HE         | 0   | HE         | HE         | HO      | HE         |
| 0   | HE         | HO         | HE         | HE       | 0   | HE         | HO      | HE         | HE         | 0   | HE         | HO         | HE      | HE         |
| 0   | HO         | HE         | HE         | HE       | 0   | HO         | HE      | HE         | HE         | 1   | HO         | HE         | HE      | HE         |
| 0   | HE         | HE         | HO         | HO       | 0   | HE         | HE      | HO         | HO         | 0   | HE         | HE         | HO      | HO         |
| 0   | HE         | HO         | HE         | HO       | 0   | HE         | HO      | HE         | HO         | 0   | HE         | HO         | HE      | HO         |
| 1   | HE         | HO         | HO         | HE       | 0   | HE         | HO      | HO         | HE         | 0   | HE         | HO         | HO      | HE         |
| 3   | HO         | HO         | HE         | HE       | 0   | HO         | HO      | HE         | HE         | 1   | HO         | HO         | HE      | HE         |
| 0   | HO         | HE         | HO         | HE       | 0   | HO         | HE      | HO         | HE         | 0   | HO         | HE         | HO      | HE         |
| 0   | HO         | HE         | HE         | HO       | 0   | HO         | HE      | HE         | HO         | 0   | HO         | HE         | HE      | HO         |
| 2   | HO         | HO         | HO         | HE       | 11  | HO         | HO      | HO         | HE         | 1   | HO         | HO         | HO      | HE         |
| 2   | HO         | HO         | HE         | HO       | 0   | HO         | HO      | HE         | HO         | 2   | HO         | HO         | HE      | HO         |
| 0   | HO         | HE         | HO         | HO       | 3   | HO         | HE      | HO         | HO         | 0   | HO         | HE         | HO      | HO         |
| 8   | HE         | HO         | HO         | HO       | 5   | HE         | HO      | HO         | HO         | 0   | HE         | HO         | HO      | HO         |
| 66  | HO         | HO         | HO         | HO       | 64  | HO         | HO      | HO         | HO         | 79  | HO         | HO         | HO      | HO         |
| 84  |            |            |            |          | 84  |            |         |            |            | 84  |            |            |         |            |
| HR% | 13,95      | 2,35       | 8,24       | 9,20     | H   | 6,98       | 5,75    | 1,16       | 14,29      | H   | 1,16       | 2,33       | 4,65    | 3,53       |

| LG7 |         |            |         |         | LG8 |         |         |            |            | LG9 |         |         |            |            |
|-----|---------|------------|---------|---------|-----|---------|---------|------------|------------|-----|---------|---------|------------|------------|
| N   | Ci03B07 | CiC3361-04 | Ci07C07 | CiD0591 | N   | Ci07B05 | MEST502 | CiC1208-01 | CiC4853-01 | N   | MEST494 | Ci07F11 | CiC4620-07 | CiC0046-02 |
|     | M1      | M2         | M3      | M4      |     | M1      | M2      | M3         | M4         |     | M1      | M2      | M3         | M4         |
| 2   | HE      | HE         | HE      | HE      | 1   | HE      | HE      | HE         | HE         | 1   | HE      | HE      | HE         | HE         |
| 0   | HE      | HE         | HE      | HO      | 0   | HE      | HE      | HE         | HO         | 0   | HE      | HE      | HE         | HO         |
| 0   | HE      | HE         | HO      | HE      | 3   | HE      | HE      | HO         | HE         | 1   | HE      | HE      | HO         | HE         |
| 1   | HE      | HO         | HE      | HE      | 2   | HE      | HO      | HE         | HE         | 1   | HE      | HO      | HE         | HE         |
| 0   | HO      | HE         | HE      | HE      | 0   | HO      | HE      | HE         | HE         | 0   | HO      | HE      | HE         | HE         |
| 2   | HE      | HE         | HO      | HO      | 4   | HE      | HE      | HO         | HO         | 1   | HE      | HE      | HO         | HO         |
| 0   | HE      | HO         | HE      | HO      | 0   | HE      | HO      | HE         | HO         | 0   | HE      | HO      | HE         | HO         |
| 3   | HE      | HO         | HO      | HE      | 11  | HE      | HO      | HO         | HE         | 6   | HE      | HO      | HO         | HE         |
| 0   | HO      | HO         | HE      | HE      | 2   | HO      | HO      | HE         | HE         | 0   | HO      | HO      | HE         | HE         |
| 0   | HO      | HE         | HO      | HE      | 0   | HO      | HE      | HO         | HE         | 0   | HO      | HE      | HO         | HE         |
| 0   | HO      | HE         | HE      | HO      | 0   | HO      | HE      | HE         | HO         | 0   | HO      | HE      | HE         | HO         |
| 16  | HO      | HO         | HO      | HE      | 19  | HO      | HO      | HO         | HE         | 8   | HO      | HO      | HO         | HE         |
| 0   | HO      | HO         | HE      | HO      | 0   | HO      | HO      | HE         | HO         | 0   | HO      | HO      | HE         | HO         |
| 0   | HO      | HE         | HO      | HO      | 7   | HO      | HE      | HO         | HO         | 0   | HO      | HE      | HO         | HO         |
| 15  | HE      | HO         | HO      | HO      | 7   | HE      | HO      | HO         | HO         | 32  | HE      | HO      | HO         | HO         |
| 46  | HO      | HO         | HO      | HO      | 29  | HO      | HO      | HO         | HO         | 36  | HO      | HO      | HO         | HO         |
| 85  |         |            |         |         | 85  |         |         |            |            | 86  |         |         |            |            |
| HR% | 27,59   | 4,71       | 4,60    | 27,59   | H   | 32,18   | 16,09   | 5,88       | 45,35      | H   | 49,43   | 3,45    | 2,33       | 19,77      |
