# Supplementary material for: Genetic mapping of centromeres in the nine Citrus clementina chromosomes using half-tetrad analysis and recombination patterns in unreduced and haploid gametes
Source: PubMed Central journal article supplement (PMC4367916; doi:10.1186/s12870-015-0464-y), 2015-03-08
Supplement: 12870_2015_464_MOESM7_ESM.pdf [file 12870_2015_464_MOESM7_ESM.pdf]

| Genotype | M1 | M2 | M3 | M4 | M5 | M6 | M7 | CENTROMERE | M8 | M9 | M10 | M11 |
|----------|----|----|----|----|----|----|----|------------|----|----|-----|-----|
| 1        | ab | ab | ab | ab | ab | ab | aa | HO         | aa | aa | ab  | aa  |
| 2        | ab | aa | aa | aa | aa | ab | ab | HO         | aa | aa | aa  | ab  |
| 3        | ab | ab | ab | aa | aa | aa | aa | HO         | aa | aa | aa  | ab  |
| 4        | ab | bb | bb | bb | bb | bb | bb | HO         | bb | bb | bb  | ab  |
| 5        | aa | aa | aa | aa | aa | aa | aa | HO         | ab | ab | ab  | ab  |
| 6        | ab | ab | aa | ab | aa | ab | aa | HO         | aa | aa | ab  | ab  |
| 7        | ab | aa | aa | aa | aa | aa | aa | HO         | aa | aa | aa  | ab  |
| 8        | ab | bb | bb | bb | bb | bb | bb | HO         | bb | bb | bb  | ab  |
| 9        | ab | bb | bb | bb | bb | bb | bb | HO         | ab | ab | ab  | ab  |
| 10       | bb | bb | bb | bb | bb | bb | bb | HO         | ab | ab | ab  | ab  |
| 11       | ab | ab | ab | aa | aa | aa | aa | HO         | ab | ab | ab  | aa  |
| 12       | aa | ab | ab | bb | bb | bb | bb | HO         | bb | bb | bb  | aa  |
| 13       | ab | ab | ab | aa | aa | aa | aa | HO         | aa | aa | aa  | ab  |
| 14       | ab | ab | ab | bb | bb | bb | bb | HO         | bb | bb | bb  | ab  |
| 15       | ab | bb | bb | bb | bb | bb | bb | HO         | ab | ab | ab  | ab  |
| 16       | ab | ab | bb | bb | bb | bb | bb | HO         | ab | ab | ab  | bb  |
| 17       | ab | aa | aa | aa | aa | aa | aa | HO         | aa | aa | aa  | ab  |
| 18       | ab | ab | ab | bb | bb | bb | bb | HO         | bb | bb | bb  | ab  |
| 19       | ab | aa | aa | aa | aa | aa | aa | HO         | aa | aa | aa  | aa  |
| 20       | aa | aa | aa | aa | bb | bb | bb | HO         | bb | bb | bb  | ab  |
| 21       | ab | ab | ab | bb | bb | bb | bb | HO         | bb | bb | ab  | ab  |
| 22       | ab | aa | aa | aa | aa | aa | aa | HO         | aa | aa | aa  | aa  |
| 23       | ab | aa | aa | aa | aa | aa | aa | HO         | aa | aa | ab  | ab  |
| 24       | ab | aa | aa | ab | bb | bb | bb | HO         | ab | ab | ab  | ab  |
| 25       | ab | ab | aa | aa | aa | aa | aa | HO         | aa | aa | aa  | ab  |
| 26       | ab | ab | ab | bb | bb | bb | bb | HO         | ab | ab | ab  | bb  |
| 27       | aa | aa | aa | aa | aa | aa | aa | HO         | aa | aa | aa  | bb  |
| 28       | ab | aa | aa | aa | aa | aa | aa | HO         | ab | ab | ab  | ab  |
| 29       | bb | ab | ab | aa | aa | aa | aa | HO         | aa | aa | aa  | ab  |
| 30       | ab | ab | ab | aa | aa | aa | aa | HO         | aa | ab | ab  | ab  |
| 31       | ab | ab | ab | aa | aa | aa | aa | HO         | ab | ab | ab  | bb  |
| 32       | ab | bb | bb | bb | bb | bb | bb | HO         | bb | bb | bb  | ab  |
| 33       | aa | aa | aa | aa | aa | aa | aa | HO         | bb | bb | bb  | bb  |
| 34       | aa | aa | aa | aa | aa | aa | aa | HO         | bb | bb | bb  | bb  |
| 35       | ab | ab | bb | bb | bb | bb | bb | HO         | bb | bb | bb  | ab  |
| 36       | aa | ab | ab | bb | bb | bb | bb | HO         | bb | bb | ab  | ab  |
| 37       | ab | aa | aa | aa | aa | aa | aa | HO         | aa | aa | aa  | aa  |
| 38       | ab | ab | ab | bb | bb | bb | bb | HO         | bb | bb | bb  | ab  |
| 39       | ab | aa | aa | aa | aa | aa | aa | HO         | aa | aa | aa  | ab  |
| 40       | ab | aa | aa | aa | aa | aa | aa | HO         | aa | aa | aa  | ab  |
| 41       | bb | bb | bb | bb | bb | bb | bb | HO         | bb | bb | bb  | bb  |
| 42       | ab | ab | ab | bb | bb | bb | bb | HO         | bb | bb | bb  | ab  |
| 43       | bb | bb | bb | bb | bb | bb | bb | HO         | bb | bb | bb  | ab  |
| 44       | ab | ab | ab | ab | ab | aa | ab | HO         | aa | aa | aa  | ab  |
| 45       | ab | ab | bb | bb | bb | bb | bb | HO         | bb | bb | bb  | ab  |
| 46       | aa | aa | aa | aa | aa | aa | aa | HO         | aa | ab | ab  | ab  |
| 47       | ab | aa | aa | aa | aa | aa | aa | HO         | aa | aa | ab  | bb  |
| 48       | aa | ab | ab | bb | bb | bb | bb | HO         | bb | ab | ab  | ab  |
| 49       | ab | ab | bb | bb | bb | bb | bb | HO         | bb | bb | bb  | ab  |
| 50       | ab | ab | bb | bb | bb | bb | bb | HO         | bb | bb | bb  | ab  |
| 51       | ab | aa | aa | aa | aa | aa | aa | HO         | aa | aa | aa  | bb  |
| 52       | aa | ab | ab | bb | bb | bb | bb | HO         | bb | bb | ab  | ab  |
| 53       | ab | ab | ab | aa | aa | aa | aa | HO         | ab | ab | aa  | ab  |
| 54       | ab | aa | aa | aa | aa | aa | aa | HO         | aa | aa | aa  | ab  |
| 55       | ab | bb | bb | bb | bb | bb | bb | HO         | bb | ab | ab  | bb  |
| 56       | ab | ab | ab | ab | ab | aa | aa | HO         | aa | aa | ab  | ab  |
| 57       | ab | aa | aa | aa | aa | aa | aa | HO         | aa | aa | aa  | ab  |
| 58       | bb | bb | bb | bb | bb | bb | bb | HO         | bb | ab | ab  | ab  |
| 59       | aa | aa | aa | aa | aa | aa | aa | HO         | aa | aa | ab  | ab  |
| 60       | ab | ab | bb | bb | bb | bb | bb | HO         | bb | bb | bb  | ab  |
| 61       | aa | ab | aa | aa | aa | aa | aa | HO         | aa | aa | aa  | ab  |
| 62       | ab | aa | aa | aa | aa | aa | aa | HO         | ab | ab | ab  | ab  |
| 63       | ab | bb | bb | bb | bb | bb | bb | HO         | bb | bb | bb  | ab  |
| 64       | ab | aa | aa | aa | aa | aa | aa | HO         | aa | aa | aa  | ab  |
| 65       | aa | aa | aa | aa | aa | aa | aa | HO         | aa | aa | aa  | ab  |
| 66       | ab | ab | aa | aa | aa | aa | aa | HO         | ab | ab | ab  | aa  |
| 67       | ab | bb | bb | bb | bb | bb | bb | HO         | bb | bb | bb  | ab  |
| 68       | ab | ab | aa | aa | aa | aa | aa | HO         | aa | aa | aa  | ab  |
| 69       | aa | aa | ab | ab | bb | bb | bb | HO         | bb | ab | ab  | ab  |
| 70       | bb | bb | bb | bb | bb | bb | bb | HO         | ab | ab | ab  | ab  |
| 71       | ab | ab | aa | aa | aa | aa | aa | HO         | aa | aa | aa  | ab  |
| 72       | ab | ab | aa | aa | aa | aa | aa | HO         | aa | aa | ab  | ab  |
| 73       | aa | aa | bb | bb | bb | bb | bb | HO         | bb | bb | bb  | bb  |
| 74       | ab | ab | ab | bb | bb | bb | bb | HO         | bb | bb | bb  | bb  |
| 75       | ab | ab | ab | aa | aa | aa | aa | HO         | aa | aa | aa  | ab  |
| 76       | ab | aa | aa | aa | aa | aa | aa | HO         | aa | aa | ab  | ab  |
| 77       | aa | aa | ab | aa | aa | aa | aa | HO         | aa | aa | aa  | aa  |
| 78       | ab | ab | ab | bb | bb | bb | bb | HO         | bb | bb | bb  | ab  |
| 79       | ab | aa | aa | aa | aa | aa | aa | HO         | aa | aa | aa  | ab  |
| 80       | ab | ab | ab | aa | aa | aa | aa | HO         | aa | ab | ab  | ab  |
| 81       | ab | ab | ab | ab | ab | aa | aa | HO         | aa | aa | aa  | ab  |
| 82       | ab | ab | bb | bb | bb | bb | bb | HO         | bb | bb | bb  | ab  |
| 83       | ab | bb | bb | bb | bb | bb | bb | HO         | bb | bb | bb  | ab  |
| 84       | ab | aa | aa | aa | aa | aa | aa | HO         | aa | aa | aa  | ab  |
| 85       | bb | ab | ab | bb | bb | bb | bb | HO         | bb | bb | ab  | ab  |
| 86       | ab | aa | aa | aa | aa | aa | aa | HO         | aa | aa | aa  | ab  |
| 87       | bb | bb | ab | bb | bb | bb | bb | HO         | ab | ab | aa  | aa  |

|       |   | Arm 1 |      |      |      |     |      |
|-------|---|-------|------|------|------|-----|------|
|       |   | 0     | 1    | 2    | 3    | 4   |      |
| Arm 2 | 0 | 3     | 4    | 2    | 0    | 0   | 10.8 |
|       | 1 | 8     | 45   | 8    | 2    | 0   | 75.9 |
|       | 2 | 1     | 8    | 1    | 0    | 0   | 12.0 |
|       | 3 | 0     | 1    | 0    | 0    | 0   | 1.2  |
|       | 4 | 0     | 0    | 0    | 0    | 0   | 0.0  |
|       |   | 14.5  | 69.9 | 13.3 | 2.41 | 0.0 |      |

### Chi squared analysis of LG 3 based on contingency table

|                              |       |
|------------------------------|-------|
| Chi-squared (Observed value) | 5.55  |
| Chi-squared (Critical value) | 21.03 |
| Freedom degree               | 12    |
| p-value                      | 0.94  |
| Significance level           | 0.05  |

Additional file 7. Analysis of crossover interference in clementine. Heterozygous (HE, ab) and homozygous (HO, aa and bb) profiles of 2n gametes analysed using 11 markers. The location of the centromere on LG 3 was estimated using HTA. Numbers in grey are the number of 2n gametes with different crossover events on one arm and between arms (0, 1, 2, 3 and 4). Numbers in bold correspond to percentages of crossovers observed in each chromosome arm. Potential interference between arms was tested for each chromosome using  $\chi^2$ -analysis based on the contingency table of the number of crossovers (grey numbers) in each chromosome arm.
