# Supplementary material for: Genetic mapping of centromeres in the nine Citrus clementina chromosomes using half-tetrad analysis and recombination patterns in unreduced and haploid gametes
Source: PubMed Central journal article supplement (PMC4367916; doi:10.1186/s12870-015-0464-y), 2015-03-08
Supplement: 12870_2015_464_MOESM8_ESM.pdf [file 12870_2015_464_MOESM8_ESM.pdf]

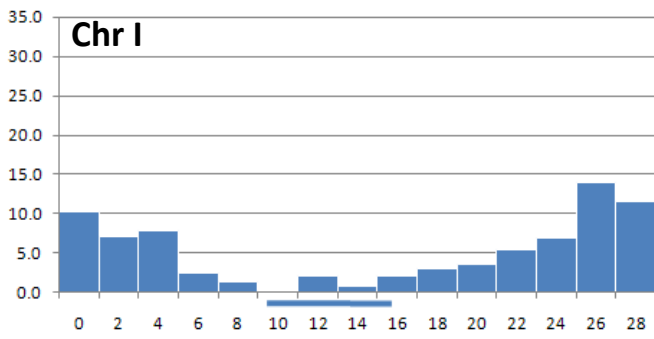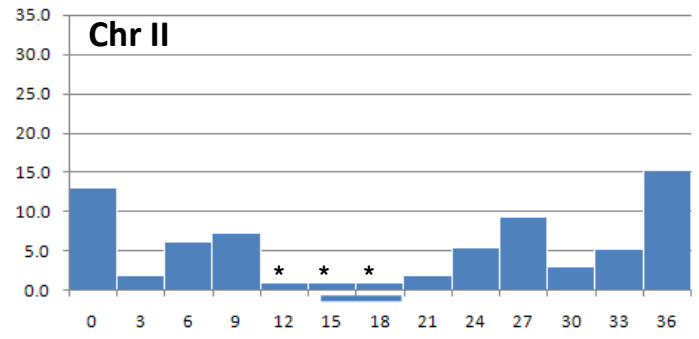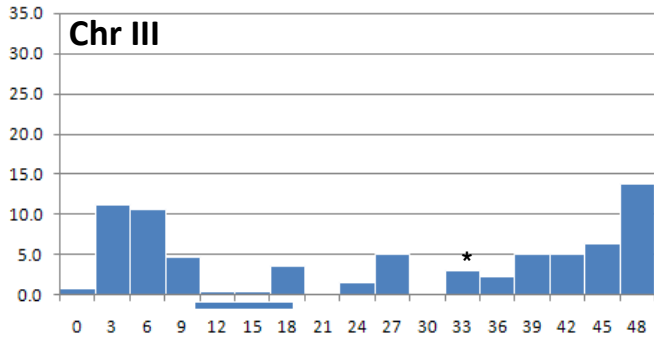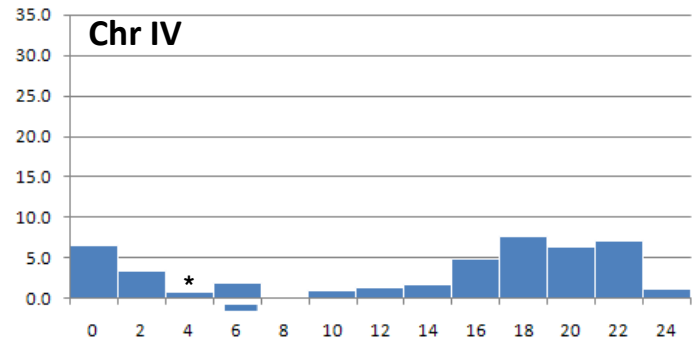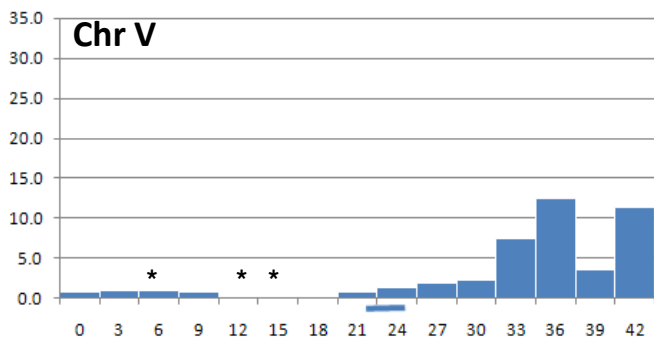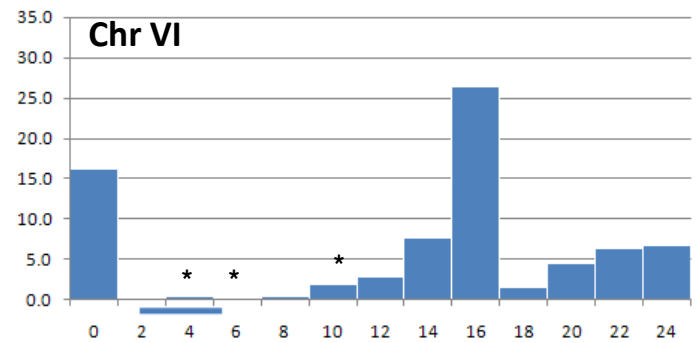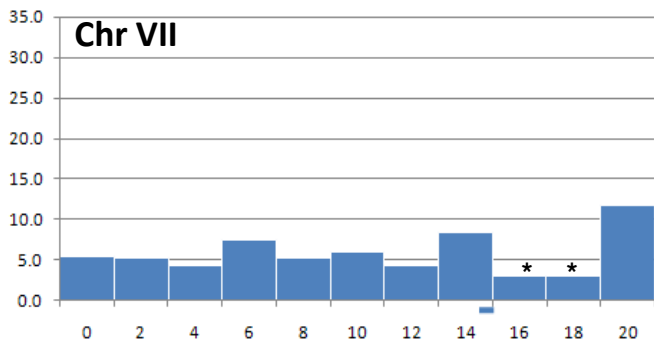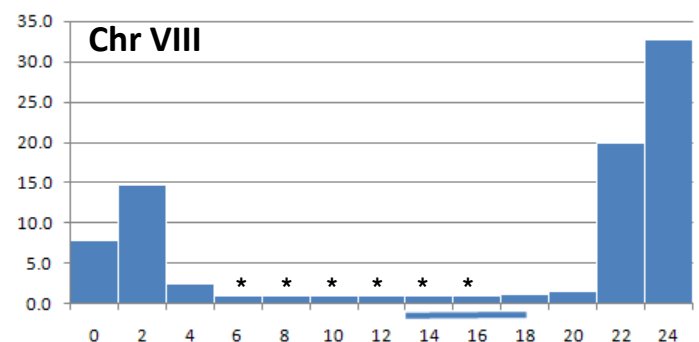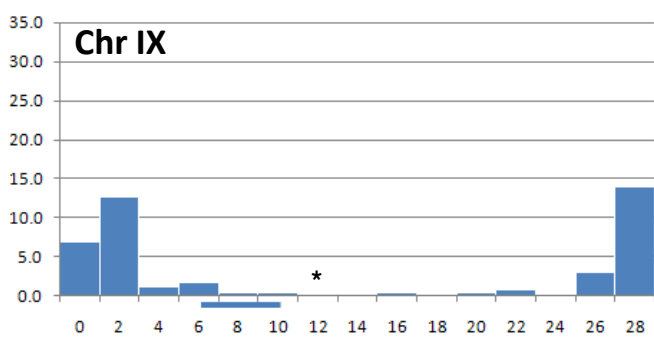

**Additional file 8. Variation in recombination rate along the different clementine chromosomes (Chr).** The x-axis shows the physical position in megabases along each chromosome and the y-axis represents the ratio of genetic distance to physical distance (cM/Mb). The bars beneath the x-axis indicate the approximate locations of the centromeres (CI).  
 \* These data have been calculated from up and down intervals (no marker on the genetic map on the considered genomic segment).
